# Supplementary material
Source: PubMed Central journal article supplement (PMC6369632)
Supplement: mmc1.pdf [file mmc1.pdf]

## **Supplemental Information**

### **Improving T Cell Receptor On-Target**

### **Specificity via Structure-Guided Design**

**Lance M. Hellman, Kendra C. Foley, Nishant K. Singh, Jesus A. Alonso, Timothy P. Riley, Jason R. Devlin, Cory M. Ayres, Grant L.J. Keller, Yuting Zhang, Craig W. Vander Kooi, Michael I. Nishimura, and Brian M. Baker**

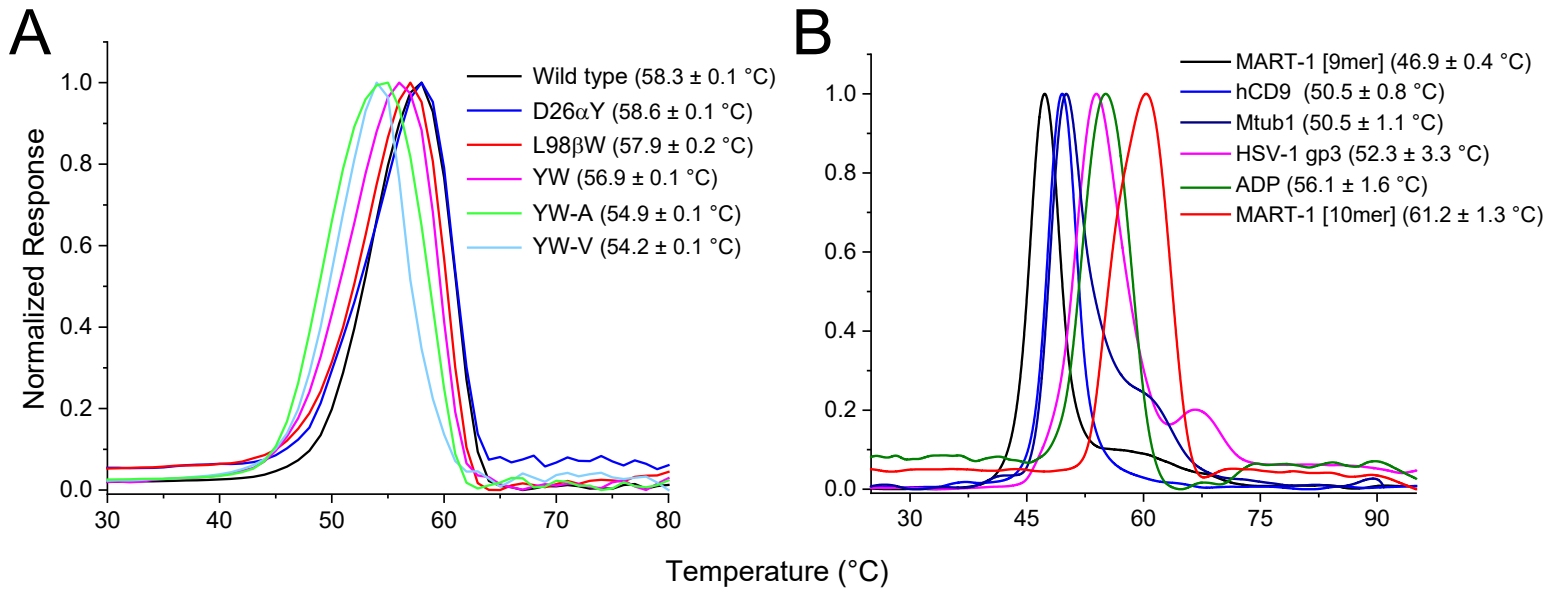

**Figure S1.** Thermal stabilities of TCRs (A) and peptide/HLA-A2 complexes (B).  $T_m$  values from non-linear least squares fitting and associated errors as described in ref. 69 are given in the insets.

DMF5<sub>YW-A</sub>-MART-1<sub>10</sub>/HLA-A2

2Fo-Fc

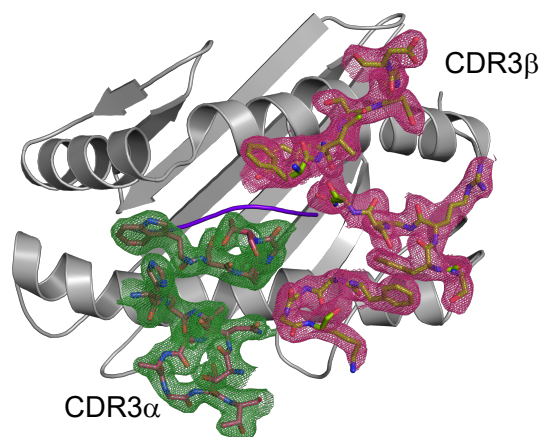

simulated annealing composite omit

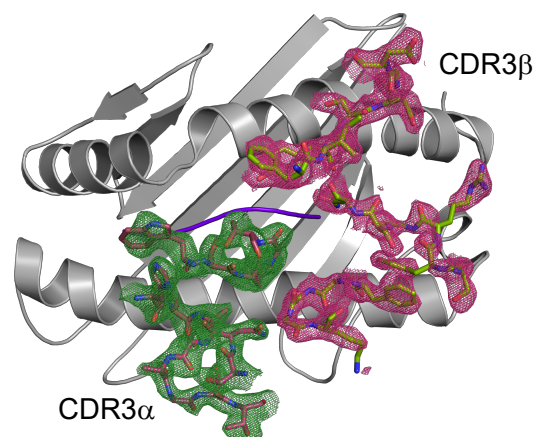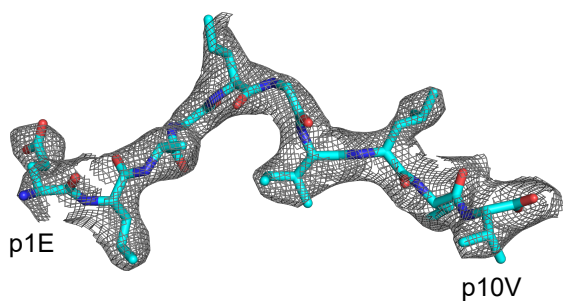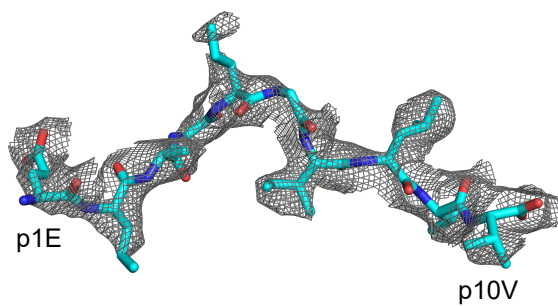

DMF5<sub>YW</sub>-MART-1<sub>9</sub>/HLA-A2

2Fo-Fc

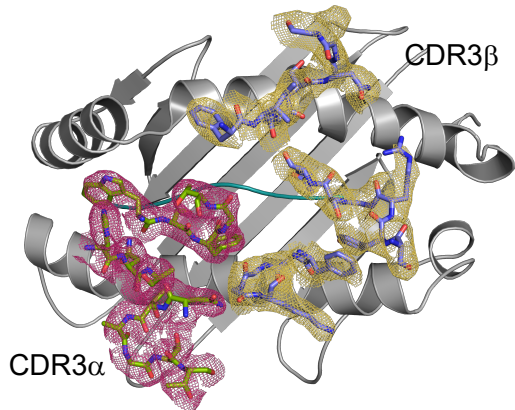

simulated annealing composite omit

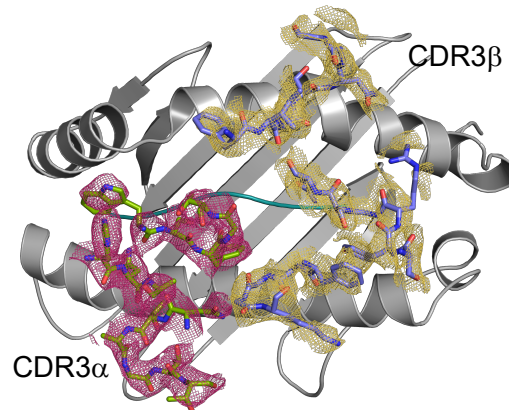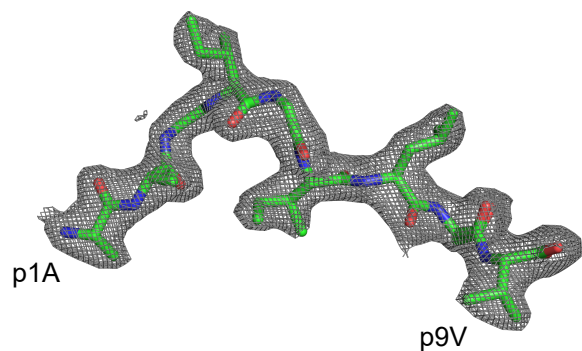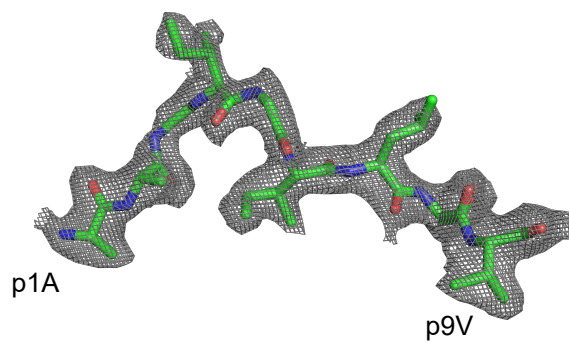

**Figure S2.** Electron density for the hypervariable loops and the peptides in the DMF5<sub>YW-A</sub> (top) and DMF5<sub>YW</sub> (bottom) TCR-pMHC structures. The left hand side shows 2Fo-Fc maps, whereas the right hand side shows simulated annealing composite omit maps. All maps are contoured at 1 $\sigma$ .

**Table S1. Binding data for pMHC complexes and variant TCRs.**

|                                   | MART-1 [9mer]    | MART-1 [10mer]              | hCD9            | HSV-1 gp3        | ADP             | Mtub1           | NLS           | SLA           | MMW                            |
|-----------------------------------|------------------|-----------------------------|-----------------|------------------|-----------------|-----------------|---------------|---------------|--------------------------------|
|                                   | AAGIGILTV        | ELAGIGILTV                  | AVGIGIAVV       | IAGIGILAI        | VDGIGILTI       | LGGLGLFFA       | NLSNLGILPV    | SLANIGILPV    | MMWDRGLGMM                     |
| DMF5 WT <sup>a</sup>              | 37 ± 3 (-6.0)    | 11 ± 1 (-6.8)               | NQ <sup>d</sup> | 96 ± 6 (-5.5)    | NQ              | NQ              | 10 ± 1 (-6.8) | 33 ± 2 (-6.1) | 35 ± 2 (-6.1)                  |
| DMF5 L98βW                        | 12 ± 1 (-6.7)    | 5.3 ± 0.3 (-7.2)            | NQ              | 87 ± 7 (-5.5)    | 179 ± 11 (-5.1) | NQ              |               |               |                                |
| DMF5 D26αY                        | 7 ± 2 (-7.0)     | 1.3 ± 0.2 (-8.0)            | 420 ± 36 (-4.6) | 8 ± 2 (-6.9)     | 54 ± 11 (-5.8)  | 148 ± 19 (-5.2) |               |               |                                |
| DMF5 <sub>YW</sub> <sup>e</sup>   | 1.8 ± 0.3 (-7.8) | 43 ± 7 <sup>b</sup> (-10.0) | 22 ± 2 (-5.4)   | 2.5 ± 0.5 (-7.2) | 58 ± 6 (-4.9)   | 50 ± 5 (-5.0)   | 12 ± 2 (-6.7) | 16 ± 2 (-6.5) | 97.6 ± 0.1 (-9.6) <sup>b</sup> |
| DMF5 Y50αF                        |                  | 24.0 ± 8.4 (-6.3)           |                 |                  |                 |                 |               |               |                                |
| DMF5 Y50αV                        |                  | 200 ± 35 (-5.1)             |                 |                  |                 |                 |               |               |                                |
| DMF5 Y50αA                        |                  | NBD <sup>c</sup>            |                 |                  |                 |                 |               |               |                                |
| DMF5 <sub>YW-A</sub> <sup>f</sup> |                  | 36.4 ± 7.1 (-6.1)           |                 |                  |                 |                 | NQ            | NDB           | 13 ± 1 (-6.7)                  |
| DMF5 <sub>YW-V</sub> <sup>g</sup> |                  | 16.1 ± 1.8 (-6.5)           |                 |                  |                 |                 | NQ            | NQ            |                                |

<sup>a</sup> Entries for TCRs give  $K_D$  values in micromolar (except where indicated) along with standard fitting error. Values in parenthesis are binding free energies in kcal/mol.

<sup>b</sup>  $K_D$  value is in nanomolar.

<sup>c</sup> NBD = no binding detected.

<sup>d</sup> NQ = binding detected, but weak and not quantified.

<sup>e</sup> DMF5 double mutant incorporating the D26αY and L98βW mutations. Binding data from refs. 30 and 33.

<sup>f</sup> DMF5 triple mutant incorporating the D26αY, L98βW, and Y50αA mutations

<sup>g</sup> DMF5 triple incorporating the D26αY, L98βW, and Y50αV mutations



**Table S2. X-ray data collection and refinement statistics**

| Data Collection                        | DMF5 <sub>YW-A</sub> -MART-1 <sub>10</sub> /HLA-A2 | DMF5 <sub>YW</sub> -MART-1 <sub>9</sub> /HLA-A2 |
|----------------------------------------|----------------------------------------------------|-------------------------------------------------|
| Source                                 | 24-ID-C                                            | 22-ID                                           |
| Wavelength (Å)                         | 1.0                                                | 1.0                                             |
| Resolution range (Å)                   | 47.94 - 2.97 (3.07 - 2.97)*                        | 40 - 2.35 (2.43 - 2.35)*                        |
| Space group                            | C 1 2 1                                            | C 1 2 1                                         |
| Unit cell                              |                                                    |                                                 |
| a,b,c (Å)                              | 226.49, 49.06, 92.50                               | 226.90, 44.09, 83.22                            |
| $\alpha,\beta,\gamma$ (°)              | 90.0, 95.0, 90.0                                   | 90.0, 106.4, 90.0                               |
| Total reflections                      | 48804 (5130)                                       | 66493 (6397)                                    |
| Unique reflections                     | 20514 (2090)                                       | 33491 (3222)                                    |
| Multiplicity                           | 2.4 (2.4)                                          | 2.0 (2.0)                                       |
| Completeness (%)                       | 94.03 (96.71)                                      | 99.55 (96.87)                                   |
| Mean I/ $\sigma$ (I)                   | 10.55 (1.95)                                       | 11.04 (1.77)                                    |
| Wilson B-factor (Å <sup>2</sup> )      | 87.02                                              | 35.35                                           |
| $R_{\text{merge}}$                     | 0.076 (0.745)                                      | 0.048 (0.307)                                   |
| CC <sub>1/2</sub>                      | 0.996 (0.836)                                      | 0.998 (0.856)                                   |
| <b>Refinement</b>                      |                                                    |                                                 |
| Reflections used in refinement         | 20214 (2090)                                       | 33472 (3219)                                    |
| Reflections used for $R_{\text{free}}$ | 1033 (107)                                         | 1660 (148)                                      |
| $R_{\text{work}}$                      | 0.229 (0.376)                                      | 0.204 (0.273)                                   |
| $R_{\text{free}}$                      | 0.286 (0.420)                                      | 0.256 (0.347)                                   |
| CC <sub>work</sub>                     | 0.949 (0.821)                                      | 0.949 (0.875)                                   |
| CC <sub>free</sub>                     | 0.930 (0.773)                                      | 0.928 (0.704)                                   |
| Number of non-hydrogen atoms           | 6539                                               | 6652                                            |
| RMS deviations from ideality           |                                                    |                                                 |
| Bond lengths (Å)                       | 0.02                                               | 0.003                                           |
| Angles (°)                             | 0.53                                               | 0.89                                            |
| Ramachandran statistics                |                                                    |                                                 |
| Favored (%)                            | 95.26                                              | 98.09                                           |
| Allowed (%)                            | 4.11                                               | 1.91                                            |
| Outliers (%)                           | 0.62                                               | 0.00                                            |
| Rotamer outliers (%)                   | 0.43                                               | 0.00                                            |
| Clashscore                             | 4.16                                               | 2.00                                            |
| Average B-factor (Å <sup>2</sup> )     | 118.0                                              | 41.00                                           |
| PDB ID                                 | 6DKP                                               | 6D78                                            |

\*Statistics for the highest-resolution shells are shown in parentheses.
